# Supplementary material
Source: publisher figshare collection journal article supplement (https://acs.figshare.com/ndownloader/files/4444372)
Supplement: Supplementary file 1 [file 4444372]

## Supporting Information

# Potent and selective inhibition of the open-channel conformation of AMPA receptors by an RNA aptamer

Zhen Huang, Yan Han, Congzhou Wang and Li Niu<sup>\*</sup>

*Department of Chemistry, and Center for Neuroscience Research, University at Albany, State  
University of New York (SUNY), Albany, New York 12222, USA*

Correspondence should be addressed to L.N. (lniu@albany.edu)

**Figure S1**

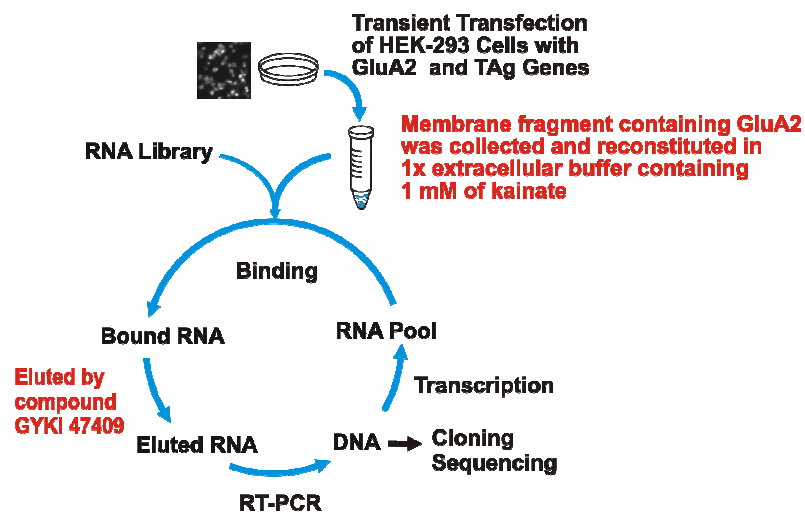

Figure S1. The use of SELEX to identify aptamers selective to the open-channel conformation of GluA2 AMPA receptors. The detailed method and operation have been described in the Experimental Procedure.

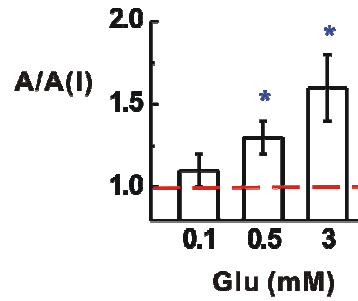

Figure S2. The inhibition effect of the full length or 100-nt AG1407 on GluA2Q<sub>flip</sub> receptor channels under different concentrations of glutamate. AG1407 inhibited the open-channel state of GluA2 receptor, but not the closed-channel state, as indicated by the whole-cell recording data tested at different concentrations of glutamate. In one-tail student *t*-test, the A/A(I) value was significantly larger than 1.0 at 0.5 and 3 mM of glutamate ( $P = 0.03$  and  $1.9 \times 10^{-4}$  respectively), as indicated by blue asterisk signs, but not at 0.1 mM of glutamate ( $P = 0.25$ ) for 0.5  $\mu$ M of AG1407. Red horizontal dashed line represents the A/A(I) value of 1.0 or there was no inhibition.

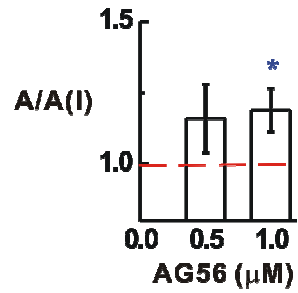

Figure S3. The AG56 had weak inhibition effect on the open-channel conformation of GluA4 receptor subunit. At 0.5  $\mu\text{M}$  of AG56, the A/A(I) was not significantly larger than 1.0 ( $P = 0.08$ ) (see also Figure 2B, left panel and the figure above). We then increased the AG56 concentration for the test. At 1  $\mu\text{M}$  of AG56, the A/A(I) ratio was 1.2 ( $P = 0.02$ ), as indicated by blue asterisk sign in this figure. Both A/A(I) values at two concentrations of AG56 contained three recordings from three different cells. The glutamate concentration was 3 mM for all the points. Red horizontal dashed line represents the A/A(I) value of 1.0 or no inhibition.

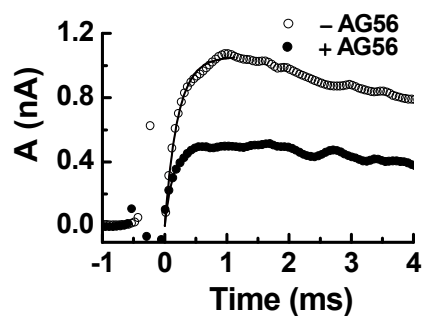

Figure S4. The whole-cell current trace collected using the laser-pulse photolysis technique. The glutamate concentration released was 0.5 mM. The  $k_{obs}$  for the control (without AG56, hollow circle) was calculated to be  $5880 \pm 55 \text{ s}^{-1}$ , whereas the  $k_{obs}$  in the presence of 1  $\mu\text{M}$  AG56 (solid black dot) was  $4980 \pm 100 \text{ s}^{-1}$ .  $A/A(I) = 1.05/0.515 = 2.0$ . It should be mentioned that  $\Delta k_{obs}$  was  $900 \text{ s}^{-1}$ , slightly larger than the value or the constant value displayed in the right panel of Figure 3C. This was because we used a higher AG56 concentration to inhibit the rate; this was consistent with the prediction by equ. 9 in that a higher inhibitor concentration generated a larger  $\Delta k_{obs}$  value. In addition, a larger % of current reduction was also contributed by the use of a higher glutamate concentration, because AG56 inhibited the receptor more strongly at a higher glutamate concentration.
